# Supplementary material
Source: PubMed Central journal article supplement (PMC4716852)

**Supplementary Figure 1. Lovastatin induces changes of protein expression in MDA-MB-231 cells under hypoxia.** MDA-MB-231 cells seeded in 150-mm dishes were treated with lovastatin (3  $\mu$ M) or vehicle control and cultured under hypoxia (1% O<sub>2</sub>) for 24 h. Whole cell lysates were extracted and subjected to antibody microarray analysis (ASB600, Full Moon BioSystems). Up-regulated (A) or down-regulated (B) proteins in lovastatin-treated MDA-MB-231 cells compared to the vehicle-treated cells were shown. The color bar at the bottom of the figure shows the relative intensity of signals between the treatment and the control groups.

Supplementary Figure 1

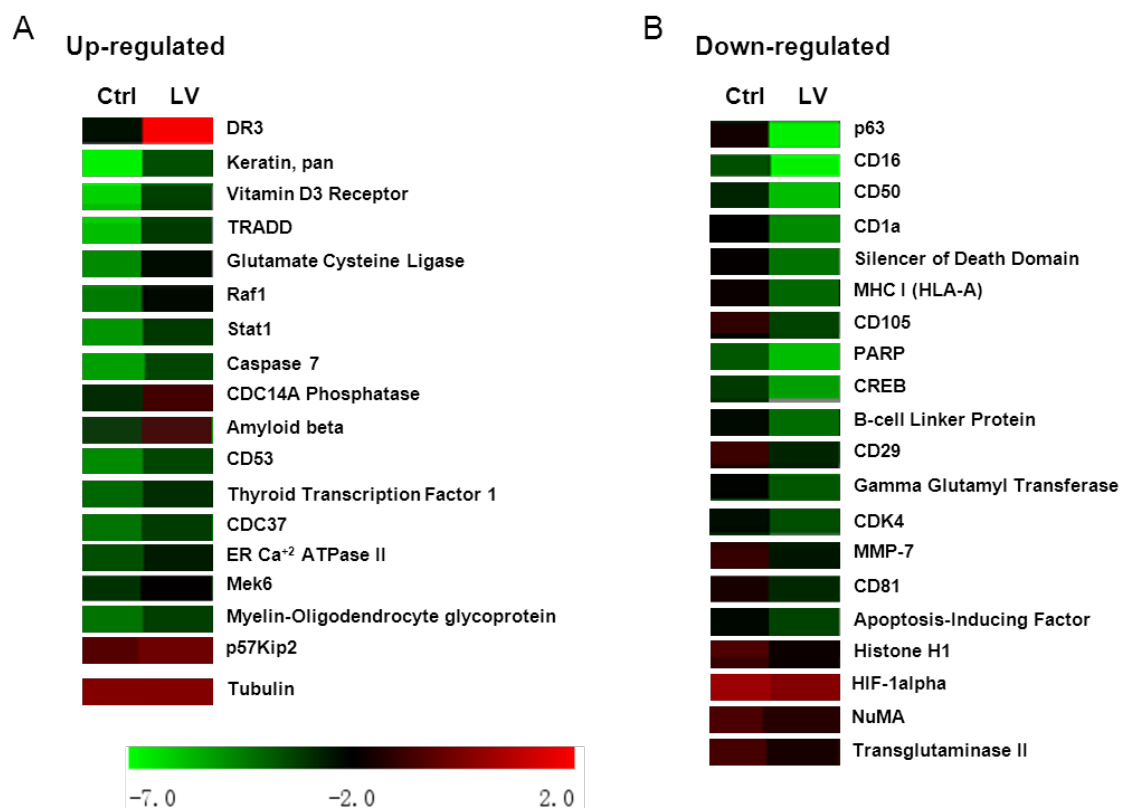

Supplement: jcav07p0192s1.pdf [file jcav07p0192s1.pdf]
